# Supplementary material for: Escape from Autologous Neutralizing Antibodies in Acute/Early Subtype C HIV-1 Infection Requires Multiple Pathways
Source: PubMed Central journal article supplement (PMC2741593; doi:10.1371/journal.ppat.1000594), 2009-09-18
Supplement: ppat.1000594.s002.pdf [file ppat.1000594.s002.pdf]

205F

```

0-PB1.1 MRVMGMSRNY QQWMIWIGLG FWMLMICSVM GNLWVTVYYG VPVWREAKTT LFCASADAKAY EREVHNVWAT HACVPTDPNP QEMFLKNVTE NFNMWKNDMV 100
0-PL4.1 -----
0-PL6.3 -----
2-PB2.3 -----
8-PB2.3 -----
14-PB5.4 -----
20-PB2.2 -----
20-PB5.2 -----
26-PB2.2 -----

```

```

0-PB1.1 DQMHEDIISL WDQSLKPCVK LTPLCVTLSC SNVSNMNDTY S.....TANCTSGGE IKNCSEFNATT EIRDKNRKEY ALFYRPDIPV LKPNDSNSRE V2
0-PL4.1 -----N-----
0-PL6.3 -----N-----
2-PB2.3 -----P-----
8-PB2.3 -----N.....DTN SI-----S
14-PB5.4 -----N-D-----NS T.....D-----S
20-PB2.2 -----D-N...YNKTY NK-----N-S
20-PB5.2 -----D-----NGTYSNDTN S-V---R---EG-S
26-PB2.2 -----N-D---G-G-N N.....-Y-----NK-S

```

```

0-PB1.1 YILINCNTST IAQACPVSF DPPIPIHYCAP AGYAILKCNND NKTFNCTGFC HNVSTVQCTH GIKPVIQTQL LLNGSLAED IIRSENLAN NVKTIIVHLN 300
0-PL4.1 -----N-----
0-PL6.3 -----
2-PB2.3 -----
8-PB2.3 -----
14-PB5.4 -----
20-PB2.2 -----
20-PB5.2 -----R-----
26-PB2.2 -L-----R-----T-----

```

```

0-PB1.1 ESVEINCTRP NNNTSQRIGR GPGQTFPATO RIIGNIROAY CSINKSKWND TLQIKIGKLO EHPFNKTIHF EPHSGGDLEI TTHSFNCRGE FFYCNTESEL 400
0-PL4.1 -----
0-PL6.3 -----
2-PB2.3 -----
8-PB2.3 -----
14-PB5.4 -----R-----R-----K-----
20-PB2.2 -----D-----E-----Q-----
20-PB5.2 -----SV-----D-----R-----E-----D-----
26-PB2.2 -----D---H-N-T-----R-----Q-----K-----

```

```

0-PB1.1 NISRLNSTSS IITLPCRIOG FINWQKRVGR AMYAPPIEGK ITCNSSITGL LLTRDGGNNT NNTETTRFGG GDMRDNRWSE LYKYKVVEIK PLGIAPTGSK 500
0-PL4.1 -----
0-PL6.3 -----A-----
2-PB2.3 -----
8-PB2.3 -G-----
14-PB5.4 -----N--T-----D-----
20-PB2.2 -----K--P-----T-----
20-PB5.2 -----P-----ST-----
26-PB2.2 ..T-----P-----S.N-----

```

```

0-PB1.1 RAVVEREKRA VGLGAVFLGF LGAAGSTMGA ASITLTVQAR QVLGAVIQQQ SNLLRAIEAQ QHMLQLTVWG IKQLQARVLA IERYLKDQOI LGIWGCSGKL 600
0-PL4.1 -----
0-PL6.3 -----
2-PB2.3 -----
8-PB2.3 -----
14-PB5.4 -----
20-PB2.2 -----K-----
20-PB5.2 -----Q-----
26-PB2.2 -----K-----S-----

```

```

0-PB1.1 ICTTAVPWNA SWSNKSQEDI WNNTTWRQWD REISNYTSII YNLLEESQNO QERNEKDLA LDSWKNLWNV FDISRWLWYI KIFIIIVGGL IGLRIIFAVL 700
0-PL4.1 -----M-----
0-PL6.3 -----M-----
2-PB2.3 -----M-----
8-PB2.3 -----M-----
14-PB5.4 -----M-M-----
20-PB2.2 -----M-M-----
20-PB5.2 -----M-M-----
26-PB2.2 -----D--M-M-----M-----

```

```

0-PB1.1 SIVNRVRQGY SPLSFQTLTP NPRELDRLGR VEEEGGEQDR DKSIRLVNGF LALFWDLLRS LCLFSYHHLR DFILIAARVV ELLGRRGWEA LKYLGLSVQY 800
0-PL4.1 -----I-----
0-PL6.3 -----I-----
2-PB2.3 -----K I-----
8-PB2.3 -----I-----V-----
14-PB5.4 -----K I-----
20-PB2.2 -----I-----
20-PB5.2 -----I-----
26-PB2.2 -----I-----

```

```

0-PB1.1 WGLELKSAI SLFDTIAIAV AEGTDRIEEL IQRFGRGILN IPTRIRQGLE AALQ 854
0-PL4.1 -----
0-PL6.3 -----
2-PB2.3 -----D-----
8-PB2.3 -----
14-PB5.4 -----L-----
20-PB2.2 -----L-----
20-PB5.2 -----L-----L-----
26-PB2.2 -----L-----

```
