# Supplementary material for: Escape from Autologous Neutralizing Antibodies in Acute/Early Subtype C HIV-1 Infection Requires Multiple Pathways
Source: PubMed Central journal article supplement (PMC2741593; doi:10.1371/journal.ppat.1000594), 2009-09-18
Supplement: ppat.1000594.s003.pdf [file ppat.1000594.s003.pdf]

```

0-PL3.1 MRVMGTSRNC QLHWIWIIGLG FMMLMICNAE EKSWVTVYVG VFWMKEAKAP LFCASDAKAY EREVHNVWAT HACVPTDNP QEIILKNVTE NFMWKMNDV 100
0-PB3.1 -----
5-PB1.1 ---EI---D-----
11-PL5.1 ---E-L---L-----
14-PL4.1 ---I---P-----
17-PL3.1 ---L-S---P-----
20-PB2.1 ---I---P-----
23-PL5.1 ---I---P-----
26-PL2.1 ---E---P-----
28-PL1.1 ---I---P-----
28-PL3.1 ---E---P-----
28-PL5.1 ---E---P-----

```

```

                                V1                                V2
0-PL3.1 DQMNEDIISL WQSLKPCVK LTPCLVLC SDYNSTANRT ESTNNTSADI KQEIKNCSFY TTTEIKDKKK AEYALPKLD IVSLYGNSS NKYRLINCNT 200
0-PB3.1 -----
5-PB1.1 -----
11-PL5.1 -----
14-PL4.1 -----
17-PL3.1 -----
20-PB2.1 -----
23-PL5.1 -----
26-PL2.1 -----
28-PL1.1 -----
28-PL3.1 -----
28-PL5.1 -----

```

```

0-PL3.1 SAVTQACPKV SFDPIPIHYC APAGYAILKC NNNTFNGTGP CANNVSTVQCT HGITPVVSTQ LLLNGSLAEK EIIIRSENLT DSVKTIIVQF NKSVEIIVCVR 300
0-PB3.1 -----
5-PB1.1 -----
11-PL5.1 -----
14-PL4.1 -----
17-PL3.1 -----
20-PB2.1 -----
23-PL5.1 -----
26-PL2.1 -----
28-PL1.1 -----
28-PL3.1 -----
28-PL5.1 -----

```

```

                                V3                                α2                                V4
0-PL3.1 BNNNTRRSVR IGRGQTFYAT GEIIGDIRQA YCNISEQTNW DTLQKVGKLL KEQFPNKIE PAPSRRGGDLE ITTHSPNCRG BFFYCNTSKL FNSTYMANST 400
0-PB3.1 -----
5-PB1.1 -----
11-PL5.1 -----
14-PL4.1 -----
17-PL3.1 -----
20-PB2.1 -----
23-PL5.1 -----
26-PL2.1 -----
28-PL1.1 -----
28-PL3.1 -----
28-PL5.1 -----

```

```

                                VS
0-PL3.1 NSTLINGTIL PCRIKQIINL WQKYGRAVVA PPLAGNITCK SNITGILLTY DGIYANSNNT TLIPRGGSG MRDNWRSELY KYKWEIRPL QVAPTAKKER 500
0-PB3.1 -----
5-PB1.1 -----
11-PL5.1 -----
14-PL4.1 -----
17-PL3.1 -----
20-PB2.1 -----
23-PL5.1 -----
26-PL2.1 -----
28-PL1.1 -----
28-PL3.1 -----
28-PL5.1 -----

```

```

                                FP                                HR1
0-PL3.1 VVEREKRAVG IGAIVPLGLG AAGSTMGAAS ITLTVQARQL LSGIVQQOSEN LLRAIEAQGH MLQLTVWGIK QLQTRVLAIE RYLKQQQLLG LWGCSGKLIC 600
0-PB3.1 -----
5-PB1.1 -----
11-PL5.1 -----
14-PL4.1 -----
17-PL3.1 -----
20-PB2.1 -----
23-PL5.1 -----
26-PL2.1 -----
28-PL1.1 -----
28-PL3.1 -----
28-PL5.1 -----

```

```

                                HR2
0-PL3.1 TTNVPWNYSV SNKTRDEIWD NMTWQWDRRE INNYTDTIYR LLEDSONQOE KNERDLLALD SWNNLWSWFD ISRWLWYIKI FIMIVGGIIG LRIIFAVLSV 700
0-PB3.1 -----
5-PB1.1 -----
11-PL5.1 -----
14-PL4.1 -----
17-PL3.1 -----
20-PB2.1 -----
23-PL5.1 -----
26-PL2.1 -----
28-PL1.1 -----
28-PL3.1 -----
28-PL5.1 -----

```

```

0-PL3.1 VNRVVRQGYSP LSFQTLIPNP RGPDRPGGIE BEGGEQDRDR SVRLVNGFLA IVWDDLRSIC LFSYHQLRDF ILIVARAVEL LGRRGREALK YLGNLVQYWG 800
0-PB3.1 -----
5-PB1.1 -----
11-PL5.1 -----
14-PL4.1 -----
17-PL3.1 -----
20-PB2.1 -----
23-PL5.1 -----
26-PL2.1 -----
28-PL1.1 -----
28-PL3.1 -----
28-PL5.1 -----

```

```

0-PL3.1 LELKKS AISL LDTIAITVAE GTRIRIELIQ RIWRALNIP RRIRQGEAT LL 852
0-PB3.1 -----
5-PB1.1 -----
11-PL5.1 -----
14-PL4.1 -----
17-PL3.1 -----
20-PB2.1 -----
23-PL5.1 -----
26-PL2.1 -----
28-PL1.1 -----
28-PL3.1 -----
28-PL5.1 -----

```
