# Supplementary material for: Escape from Autologous Neutralizing Antibodies in Acute/Early Subtype C HIV-1 Infection Requires Multiple Pathways
Source: PubMed Central journal article supplement (PMC2741593; doi:10.1371/journal.ppat.1000594), 2009-09-18

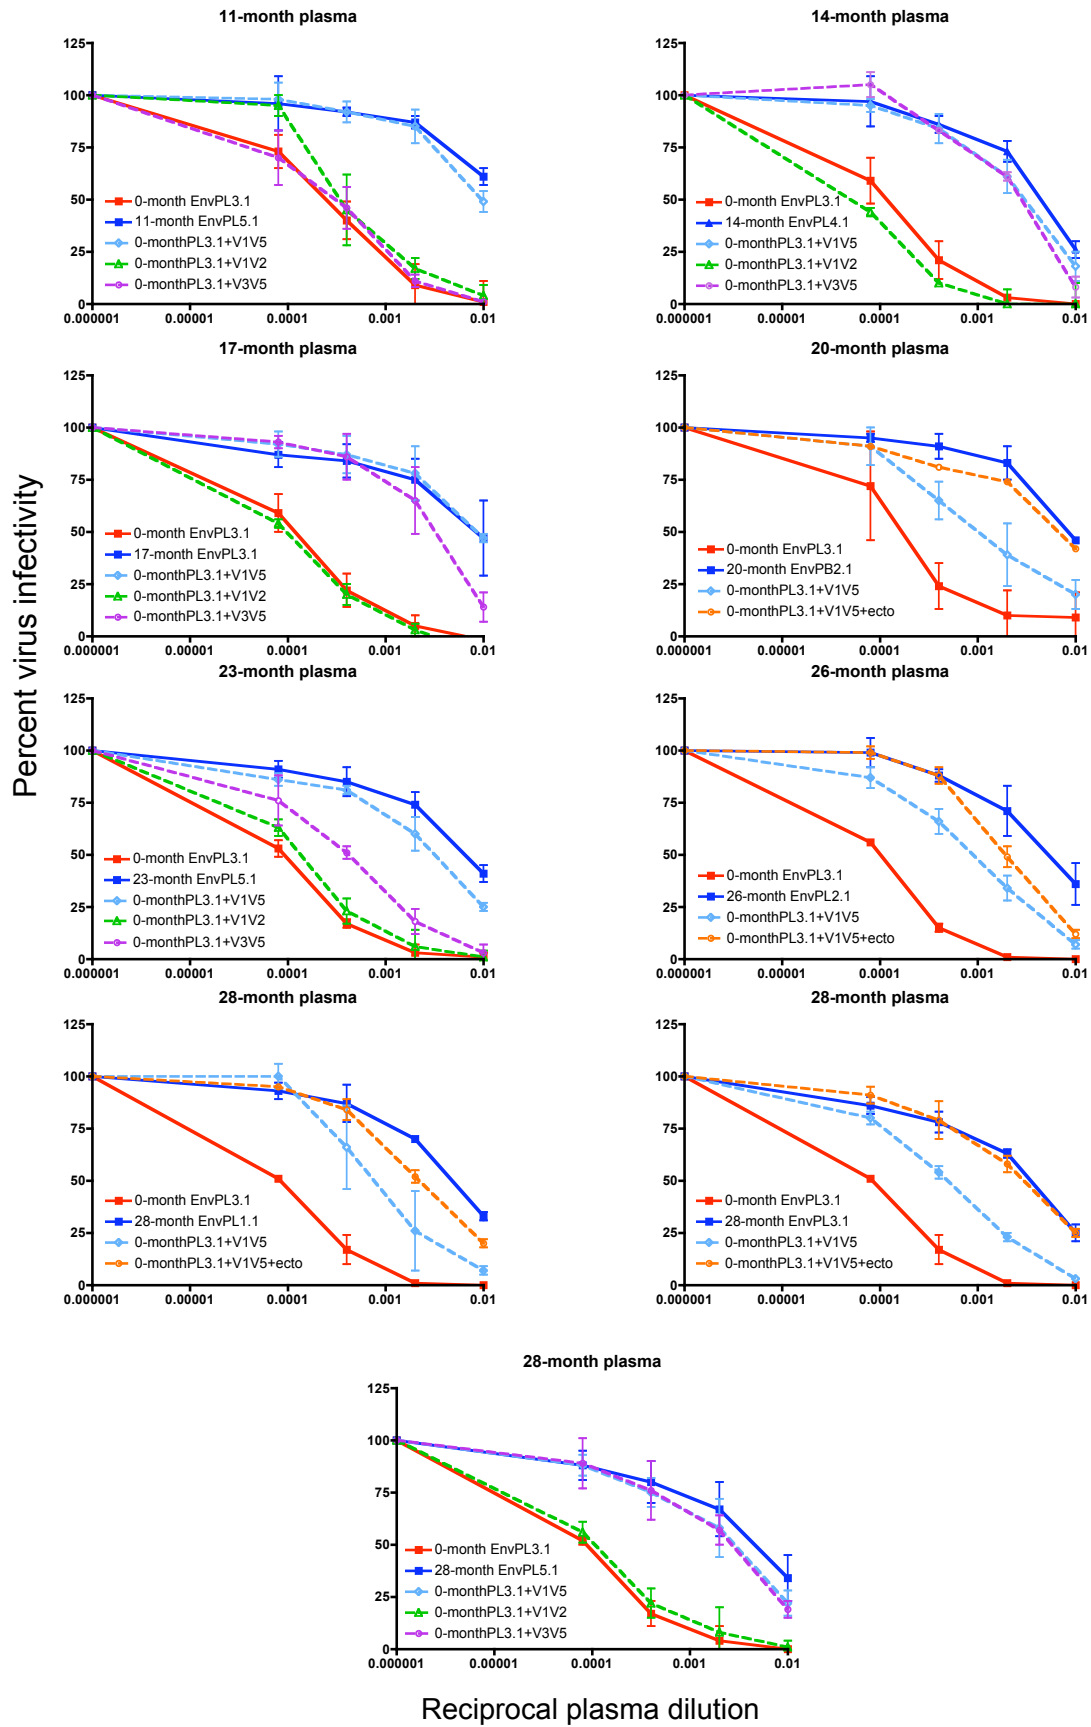

Supplement: ppat.1000594.s004.pdf [file ppat.1000594.s004.pdf]
